# Supplementary material for: Human Breathable Air in a Mediterranean Forest: Characterization of Monoterpene Concentrations under the Canopy
Source: MDPI journal article supplement (doi:10.3390/ijerph17124391), 2020-06-18
Supplement: s1 [file s1]

## Supplementary material

**Figure S1.** Evolution of the meteorological variables during the sampling period.

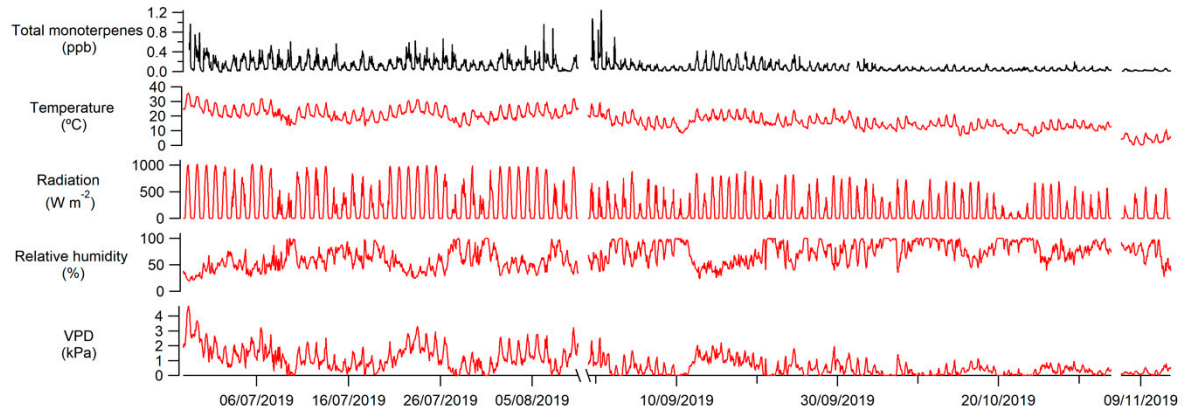

**Figure S2.** Correlation between air humidity and monoterpenes concentrations.

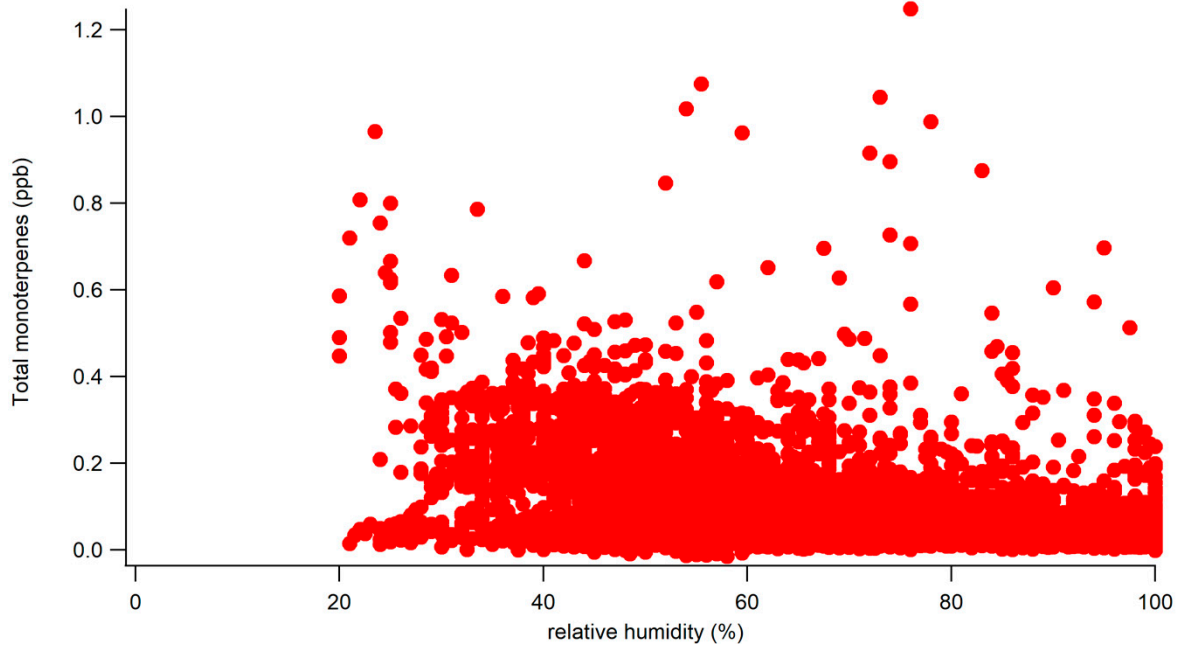

**Figure S3.** Correlation between air vapor pressure deficit (vpd) and monoterpenes concentrations.

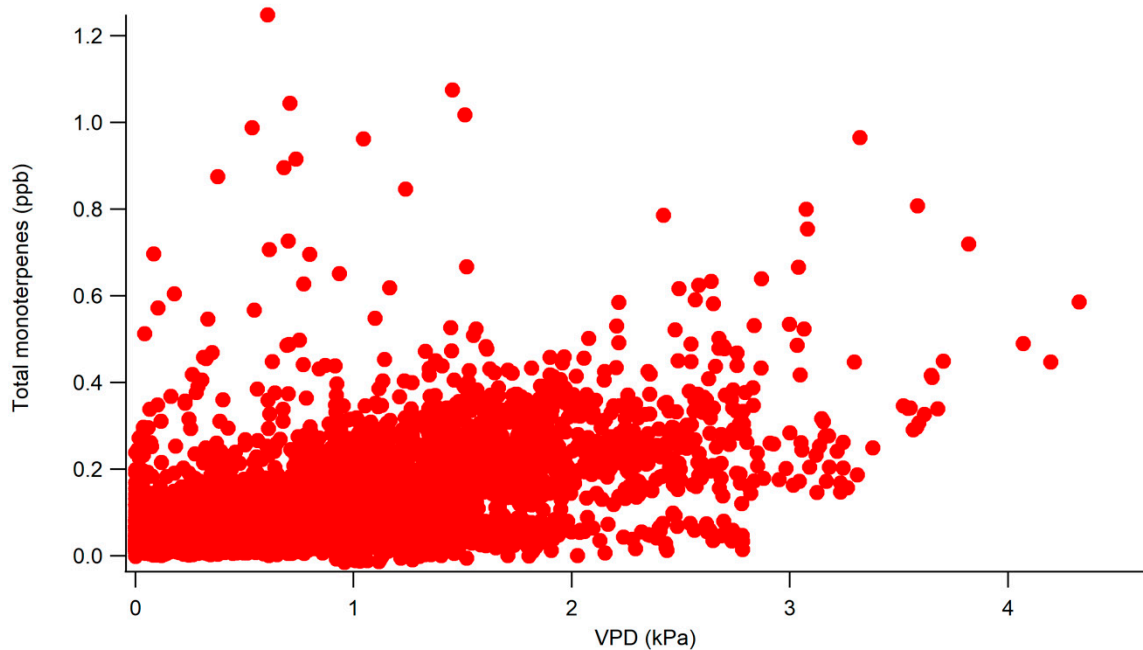

**Table S1.** Outcomes from the GLM conducted to assess the effect of air temperature, solar radiation, air humidity and vapor pressure deficit (vpd) on monoterpenes concentrations. Please note that a log conversion was applied to the monoterpenes concentrations. Thus, the estimates can not be interpreted straight forward.

|                 | <b>Estimate</b> | <b>Std. Error</b> | <b>t Value</b> | <b>p Value</b> |
|-----------------|-----------------|-------------------|----------------|----------------|
| Temperature     | 0.0317485       | 0.0014668         | 21.645         | 2,00E-16       |
| Solar radiation | 0.0141676       | 0.0006222         | 22.770         | 2,00E-16       |
| air humidity    | 0.0073928       | 0.0007777         | 9.506          | 2,00E-16       |
| vpd             | 0.0055614       | 0.0008918         | 6.236          | 4.82e-10       |
